# Supplementary material for: The quantitative detection of HO˙ generated in a high temperature H2O2 bleaching system with a novel fluorescent probe benzenepentacarboxylic acid
Source: Royal Society of Chemistry journal article supplement (doi:10.1039/c3ra45975f), 2013-11-19
Supplement: c3ra45975f.pdf [file c3ra45975f.pdf]

## Electronic Supplementary Information

### Quantitative detection of HO• generated in high temperature H<sub>2</sub>O<sub>2</sub> bleaching system with a novel fluorescent probe benzenepentacarboxylic acid

Fang Si,<sup>ab</sup> Xuan Zhang<sup>\*a</sup> and Kelu Yan<sup>\*ab</sup>

<sup>a</sup> School of Chemistry, Chemical Engineering and biotechnology, Donghua University, Shanghai 201620, P. R. China. E-mail: xzhang@dhu.edu.cn; klyan@dhu.edu.cn; Tel.: +86 021 67792619; Fax: +86 021 67792619

<sup>b</sup> National Engineering Research Center for Dyeing and Finishing of Textiles, Donghua University, Shanghai 201620, P. R. China

#### Contents

1. ESI-MS spectra of reaction mixtures of BA (left) and TA (right) with H<sub>2</sub>O<sub>2</sub> under alkaline and high temperature conditions
2. Scavenging effect of HO• with DMSO
3. Comparison of HO• generation in H<sub>2</sub>O<sub>2</sub> alkali system and Fenton buffer system
4. <sup>1</sup>H NMR spectra of HBA
5. <sup>13</sup>C NMR spectra of HBA
6. ESI-MS spectra of HBA

## 1. ESI-MS spectra of reaction mixtures of BA (left) and TA (right) with H<sub>2</sub>O<sub>2</sub> under alkaline and high temperature conditions

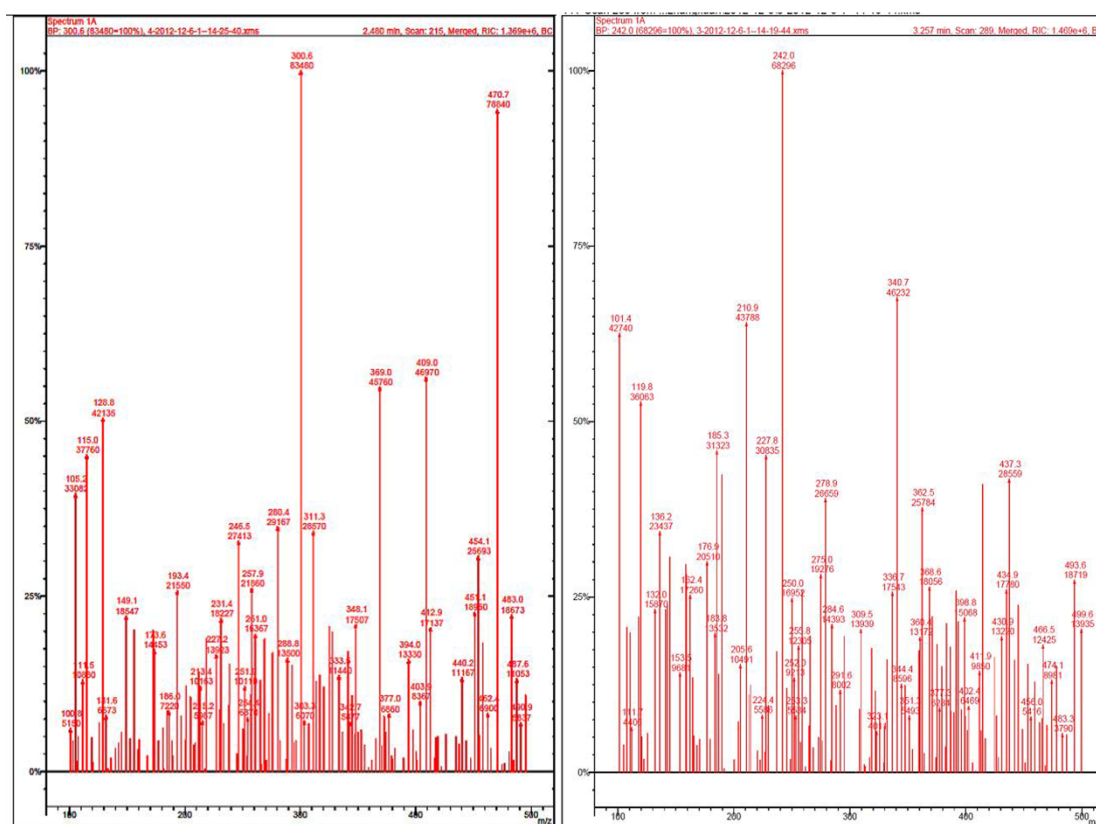

**Fig. S1** ESI-MS spectra of reaction mixtures of BA (left) and TA (right) with H<sub>2</sub>O<sub>2</sub> under alkaline and high temperature conditions. BA ( $4 \times 10^{-4}$  mol l<sup>-1</sup>); TA ( $4 \times 10^{-4}$  mol l<sup>-1</sup>); H<sub>2</sub>O<sub>2</sub> ( $2.2 \times 10^{-4}$  mol l<sup>-1</sup>); T=80°C; pH = 10.0; t=60 min.

## 2. Scavenging effect of HO• with DMSO

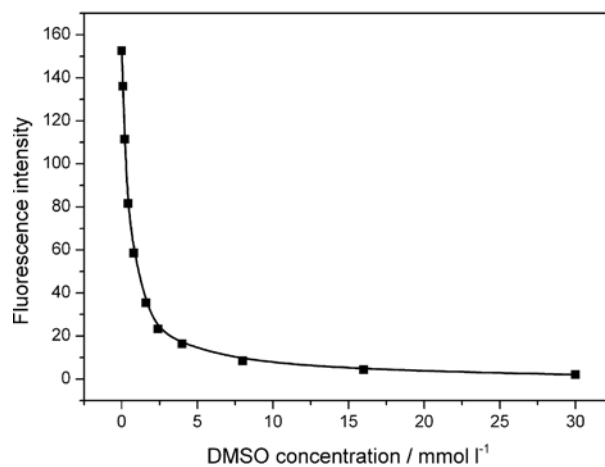

**Fig. S2.** Scavenging effect of HO• with DMSO. DMSO (0.08-30 mmol l<sup>-1</sup>); BA ( $4 \times 10^{-4}$  mol

$\Gamma^{-1}$ );  $\text{H}_2\text{O}_2$  ( $2.2 \times 10^{-4} \text{ mol } \Gamma^{-1}$ );  $T=80^\circ\text{C}$ ;  $\text{pH} = 10.0$ ;  $t=60 \text{ min}$ .

### 3. Comparison of $\text{HO}\cdot$ generation in $\text{H}_2\text{O}_2$ alkali system and Fenton buffer system

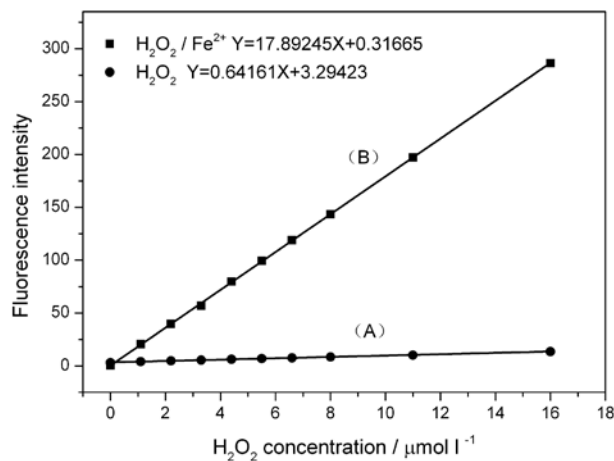

**Fig. S3.** Comparison of  $\text{HO}\cdot$  generation in  $\text{H}_2\text{O}_2$  alkali system and Fenton buffer system. (A)  $\text{H}_2\text{O}_2$  alkaline system: BA  $4 \times 10^{-4} \text{ mol } \Gamma^{-1}$ ,  $T=80^\circ\text{C}$ ,  $\text{pH} = 10.0$ ,  $t=60 \text{ min}$ . (B)  $\text{Fe}^{2+}/\text{H}_2\text{O}_2$  buffer system: BA ( $20 \mu\text{mol } \Gamma^{-1}$ ),  $\text{Fe(II)}$  ( $8 \mu\text{mol } \Gamma^{-1}$ ),  $\text{KH}_2\text{PO}_4\text{-K}_2\text{HPO}_4$  ( $0.02 \text{ mol } \Gamma^{-1}$ ,  $\text{pH} 7.4$ ), Room temperature,  $t=30 \text{ min}$ .  $\text{H}_2\text{O}_2$  ( $1 \times 10^{-6}$ - $1.6 \times 10^{-5} \text{ mol } \Gamma^{-1}$ ).

### 4. $^1\text{H}$ NMR spectra of HBA

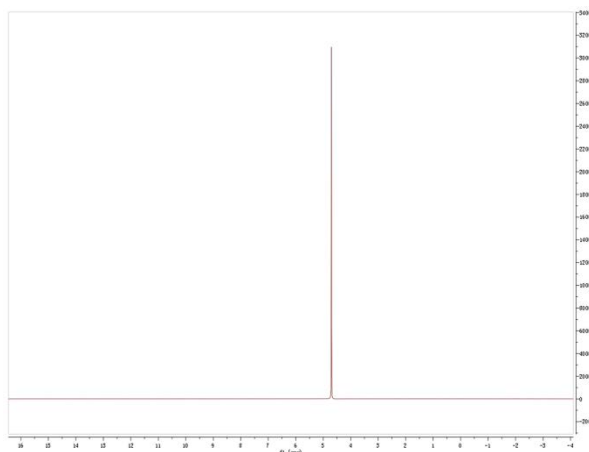

**Fig. S4.**  $^1\text{H}$  NMR spectrum of HBA.

### 5. $^{13}\text{C}$ NMR spectra of HBA

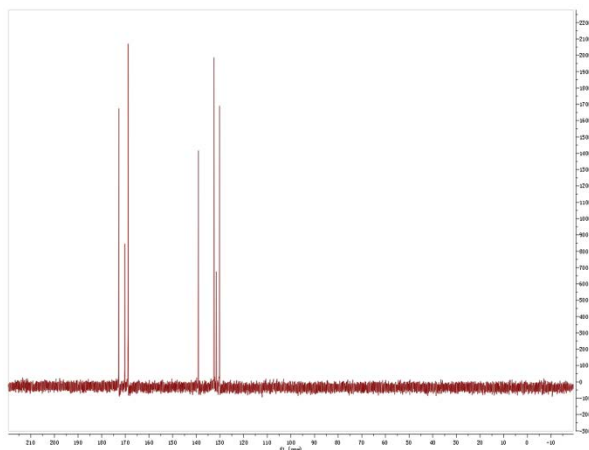

**Fig. S5.**  $^{13}\text{C}$  NMR spectrum of HBA.

## 6. ESI-MS spectra of HBA

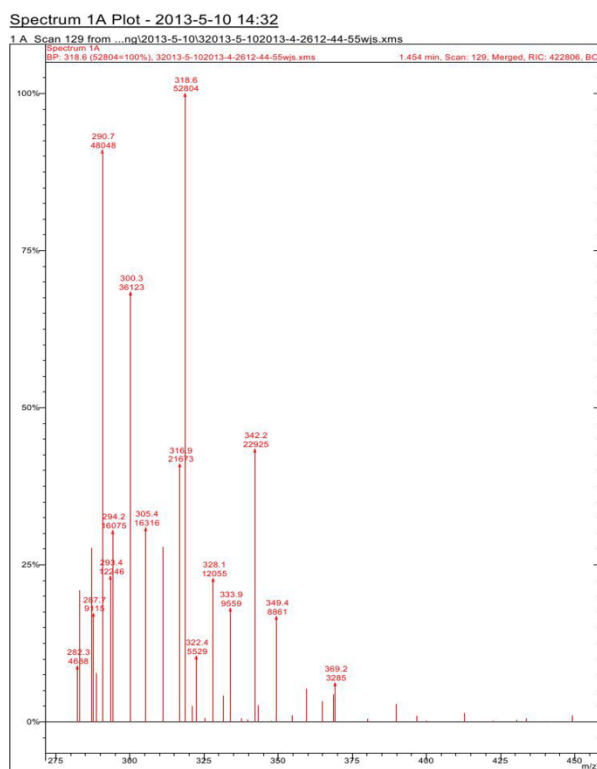

**Fig. S6.** ESI-MS spectrum of HBA.
